# Supplementary material
Source: Copernicus journal article supplement (doi:10.5194/egusphere-2026-1492)
Supplement: Supplementary file 1 [file egusphere-2026-1492-supplement.pdf]

*Supplement of*

## **The 2020 abrupt drainage of Jinwuco triggered lake- to land- terminus transition and lagged slowdown of Jinwu Glacier, southeastern Tibet**

Yunyi Luo<sup>1,2</sup>, Qiao Liu<sup>1</sup>, Yin Fu<sup>1</sup>, Xueyuan Lu<sup>1,2</sup>, Yongsheng Yin<sup>1,2</sup>, Jiawei Yang<sup>1,2</sup>, Guoxiong Zheng<sup>3</sup>, Xuyang Lu<sup>1</sup>

1 Key Laboratory of Mountain Hazards and Engineering Resilience, Institute of Mountain Hazard and Environment, Chinese Academy of Sciences, Chengdu 610213, China.

2 University of Chinese Academy of Sciences, Beijing 100049, China.

3 School of Earth and Environmental Sciences, Lanzhou University, Lanzhou 730000, People's Republic of China

Correspondence: Qiao Liu; liuqiao@imde.ac.cn

Table S 1 Remote sensing imagery used for proglacial lake boundary extraction.

| Time       | ID                   |
|------------|----------------------|
| 1990-11-16 | LT05_136039_19901116 |
| 1991-11-19 | LT05_136039_19911119 |
| 1992-12-07 | LT05_136039_19921207 |
| 1993-10-24 | LT05_136039_19931124 |
| 1994-11-11 | LT05_136039_19941111 |
| 1995-07-25 | LT05_136039_19950725 |
| 1996-11-16 | LT05_136039_19961116 |
| 1997-11-03 | LT05_136039_19971103 |
| 1998-10-05 | LT05_136039_19981005 |
| 1999-10-24 | LT05_136039_19991024 |
| 2000-10-02 | LE07_136039_20001002 |
| 2001-11-21 | LE07_136039_20011122 |
| 2002-08-13 | LT05_136039_20020813 |
| 2003-11-04 | LT05_136039_20031104 |
| 2004-10-21 | LT05_136039_20041021 |
| 2005-09-06 | LT05_136039_20050906 |
| 2006-10-11 | LT05_136039_20061011 |
| 2007-06-24 | LT05_136039_20070624 |
| 2008-10-16 | LT05_136039_20081016 |
| 2009-07-15 | LT05_136039_20090715 |
| 2010-10-06 | LT05_136039_20101006 |
| 2011-10-25 | LT05_136039_20111025 |
| 2012-10-19 | LE07_136039_20121019 |
| 2013-09-12 | LC08_136039_20130912 |
| 2014-10-01 | LC08_136039_20141001 |
| 2015-10-20 | LC08_136039_20151020 |
| 2016-08-19 | PlanetScope          |
| 2017-08-27 |                      |
| 2018-10-31 |                      |
| 2019-09-26 |                      |
| 2020-08-17 |                      |
| 2021-09-28 |                      |
| 2022-08-25 |                      |
| 2023-09-13 |                      |
| 2024-08-25 |                      |
| 2025-09-29 |                      |

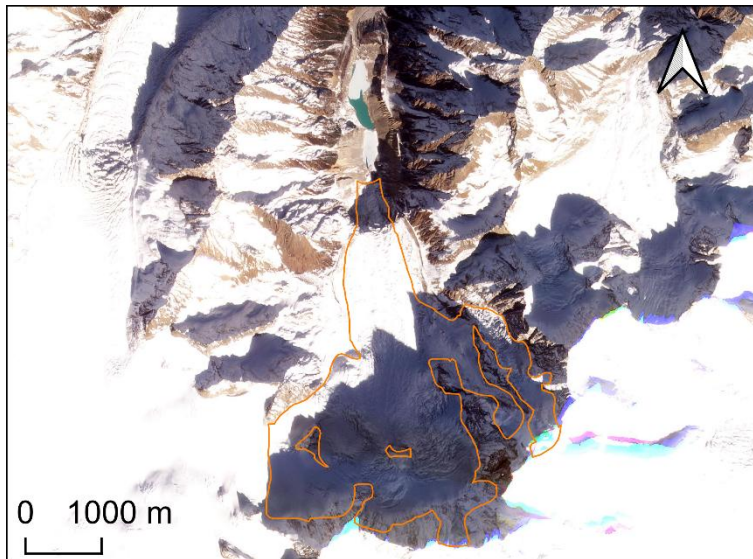

Figure S 1 Example of terrain shadows covering Jinwu Glacier. The map is based on PlanetScope imagery acquired on 4 December 2022.

Table S 2 Satellite image pairs used for velocity field calculation in this study.

| Year | PlanetScope (NIR 3m) |            | Velocity stable terrain ( $\text{m a}^{-1}$ ) |      |
|------|----------------------|------------|-----------------------------------------------|------|
|      | Pre-image            | Post-image | Mean                                          | NMAD |
| 2017 | 2016-09-10           | 2017-10-06 | 3.47                                          | 2.33 |
| 2018 | 2017-10-06           | 2018-09-18 | 1.98                                          | 1.14 |
| 2019 | 2018-09-18           | 2019-10-05 | 2.24                                          | 1.31 |
| 2020 | 2019-10-05           | 2020-09-03 | 2.86                                          | 1.73 |
| 2021 | 2020-09-03           | 2021-09-21 | 3.87                                          | 2.58 |
| 2022 | 2021-09-21           | 2022-09-11 | 2.24                                          | 1.38 |
| 2023 | 2022-09-11           | 2023-09-13 | 1.58                                          | 0.82 |
| 2024 | 2023-09-13           | 2024-09-18 | 2.31                                          | 1.41 |
| 2025 | 2024-09-18           | 2025-09-24 | 3.28                                          | 1.76 |

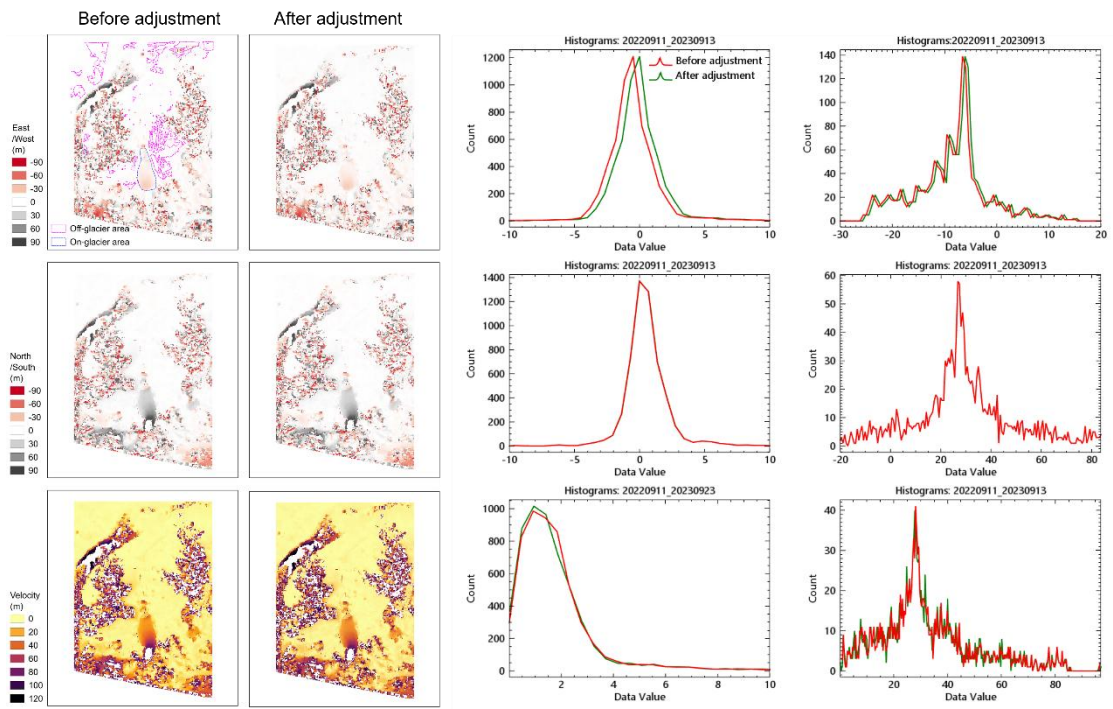

Figure S 2 An example of reducing uncertainty in north/south and east/west geolocation between two image pairs by detecting and correcting systematic shifts in selected non-glacier areas, adjusting them to zero.

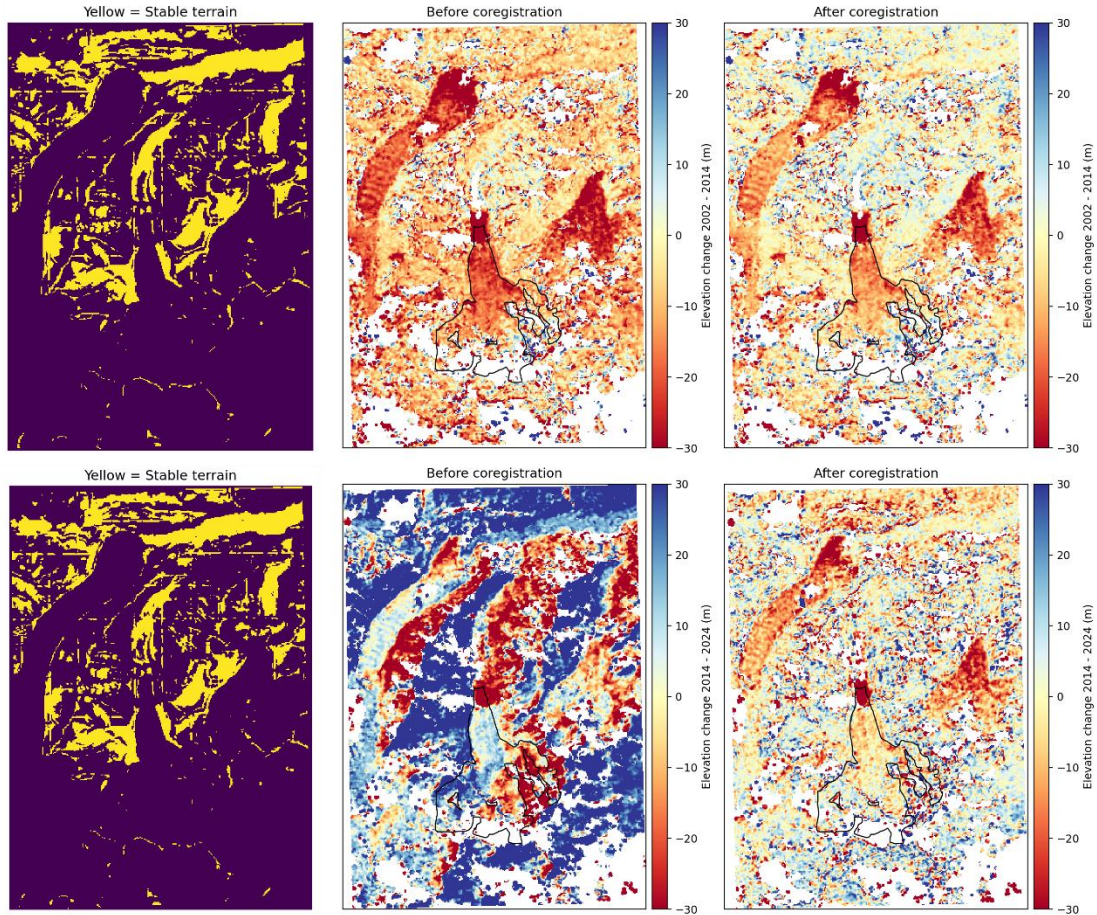

Figure S 3 DEM co-registration

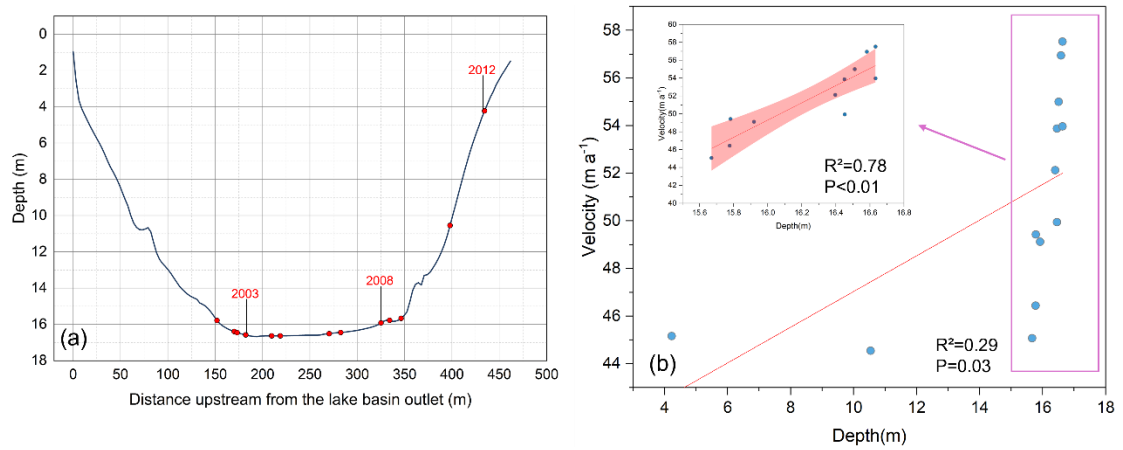

Figure S 4 (a) Longitudinal profile of proglacial lake depth at the glacier terminus, measured after the 2020 GLOF (Zhang et al., 2019). Red dots indicate the mapped positions of the glacier terminus during 2000 - 2012, and labels mark selected years. (b) Relationship between glacier surface velocity and lake depth at the corresponding terminus positions. The pink box marks the data enlarged in the inset, which shows the correlation for depths greater than 15 m. Solid lines indicate linear fits, and shaded areas indicate the 95% confidence intervals.

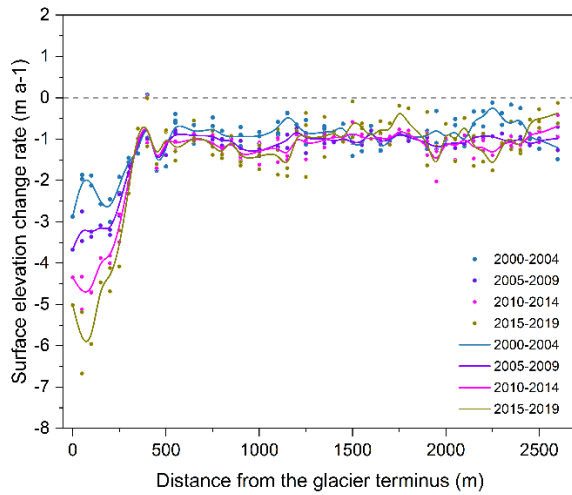

Figure S 5 Longitudinal profiles of glacier surface elevation change rates as a function of distance from the glacier terminus for 2000 - 2004, 2005 - 2009, 2010 - 2014, and 2015 - 2019, based on (Hugonnet et al., 2021). Dots indicate sampled values at 50 m intervals, and solid lines denote the corresponding smoothed curves.

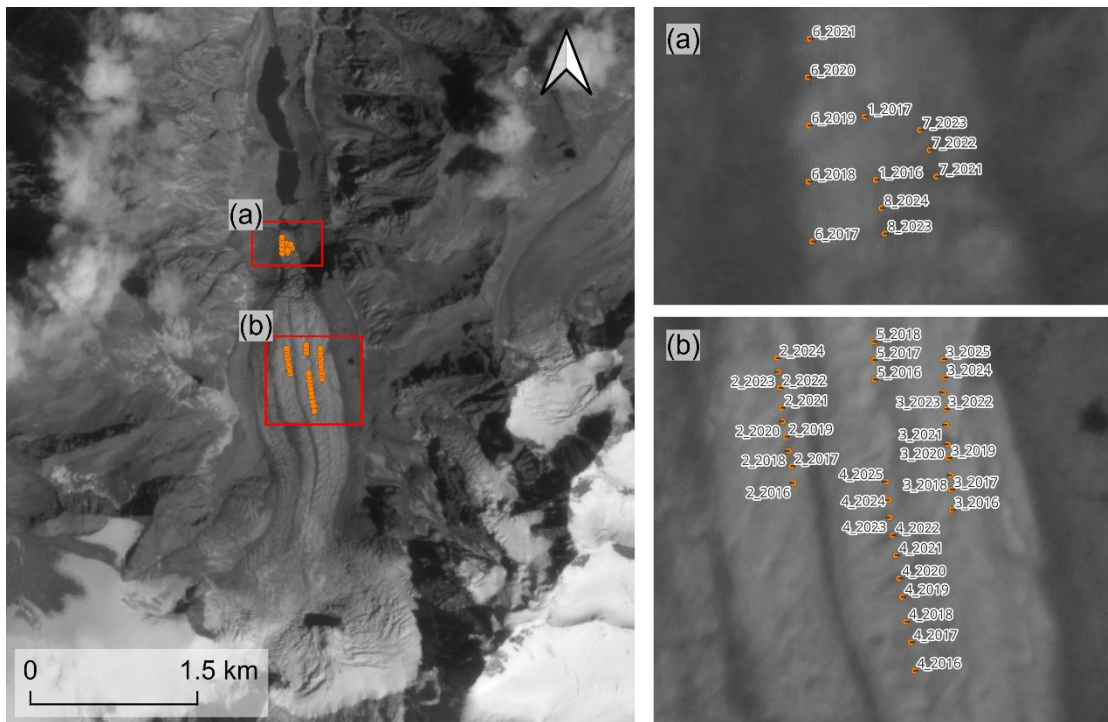

Figure S 6 Reference points selected for manual displacement measurements. The basemap is an image from PlanetScope taken on September 3, 2020.

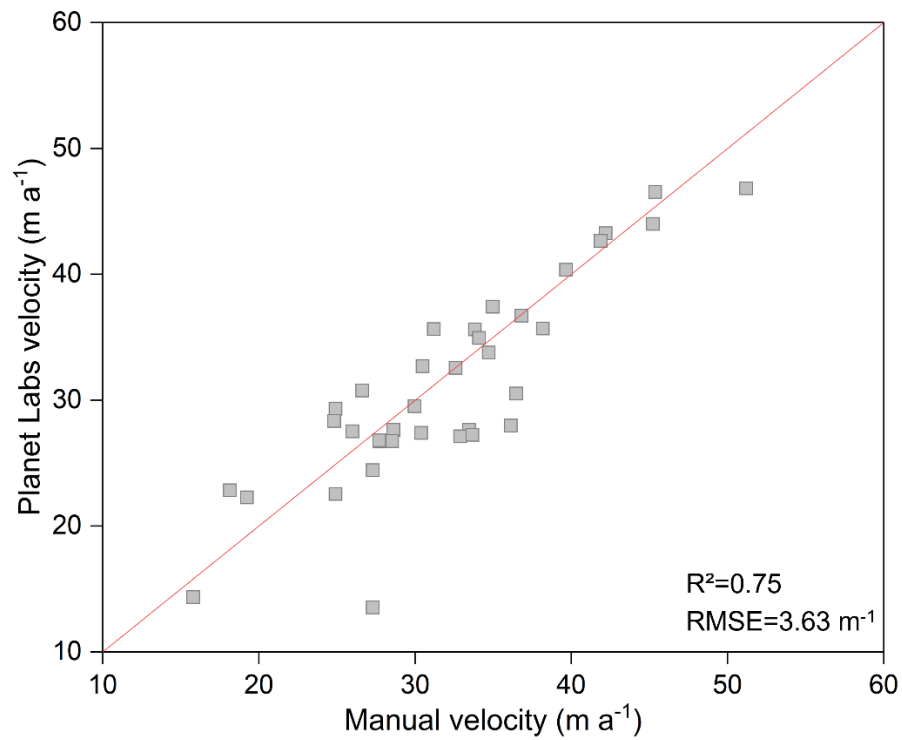

Figure S 7 Plotted comparison between Planet and manual estimates.

Hugonnet, R., McNabb, R., Berthier, E., Menounos, B., Nuth, C., Girod, L., Farinotti, D., Huss, M., Dussaillant, I., Brun, F., and Kaab, A.: Accelerated global glacier mass loss in the early twenty-first century, *Nature*, 592, 726–731, [10.1038/s41586-021-03436-z](https://doi.org/10.1038/s41586-021-03436-z), 2021.

Zhang, G., Bolch, T., Allen, S., Linsbauer, A., Chen, W., and Wang, W.: Glacial lake evolution and glacier–lake interactions in the Poiqu River basin, central Himalaya, 1964–2017, *Journal of Glaciology*, 65, 347–365, [10.1017/jog.2019.13](https://doi.org/10.1017/jog.2019.13), 2019.
